# Supplementary material
Source: publisher site journal article supplement (https://www.dovepress.com/article/576680)
Supplement: Supplementary file 1 [file 576680%20Supplementary%20files.pdf]

## Supplementary files

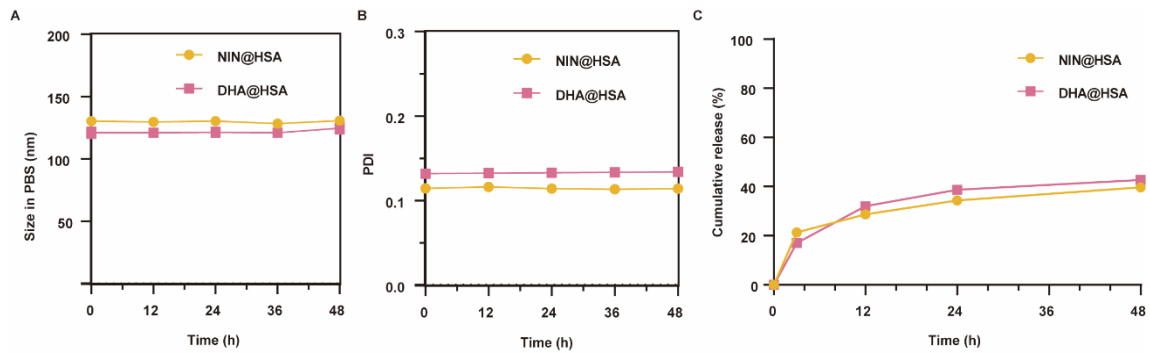

**Figure S1. Stability and in vitro release kinetics of DHA@HSA and NIN@HSA nanoparticles.**

Hydrodynamic diameter (A), polydispersity index (B), and cumulative drug release profiles (C) of DHA@HSA and NIN@HSA nanoparticles were evaluated in PBS (pH 7.4) at 37°C over 48 h. Both formulations showed stable particle size and low PDI values, along with controlled and sustained drug release. Data are shown as mean  $\pm$  SD (n = 3).

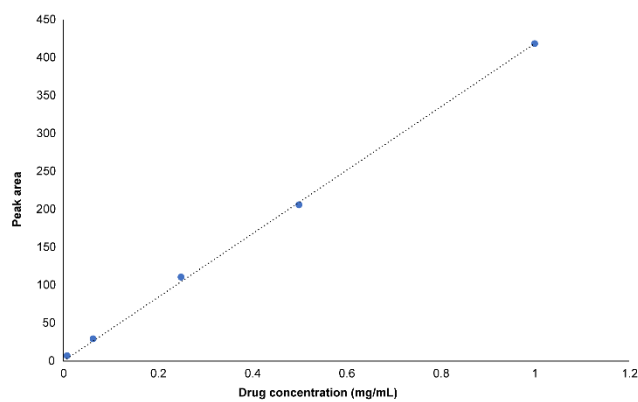

**Figure S2 Standard calibration curve for DHA determination by HPLC.**

The calibration curve was constructed by plotting the peak area against the drug concentration. The linear regression equation is  $y = 414.6904x + 2.8628$  ( $R^2 = 0.9998$ ). In this equation,  $y$  represents the peak area, and  $x$  represents the concentration of DHA (mg/mL).

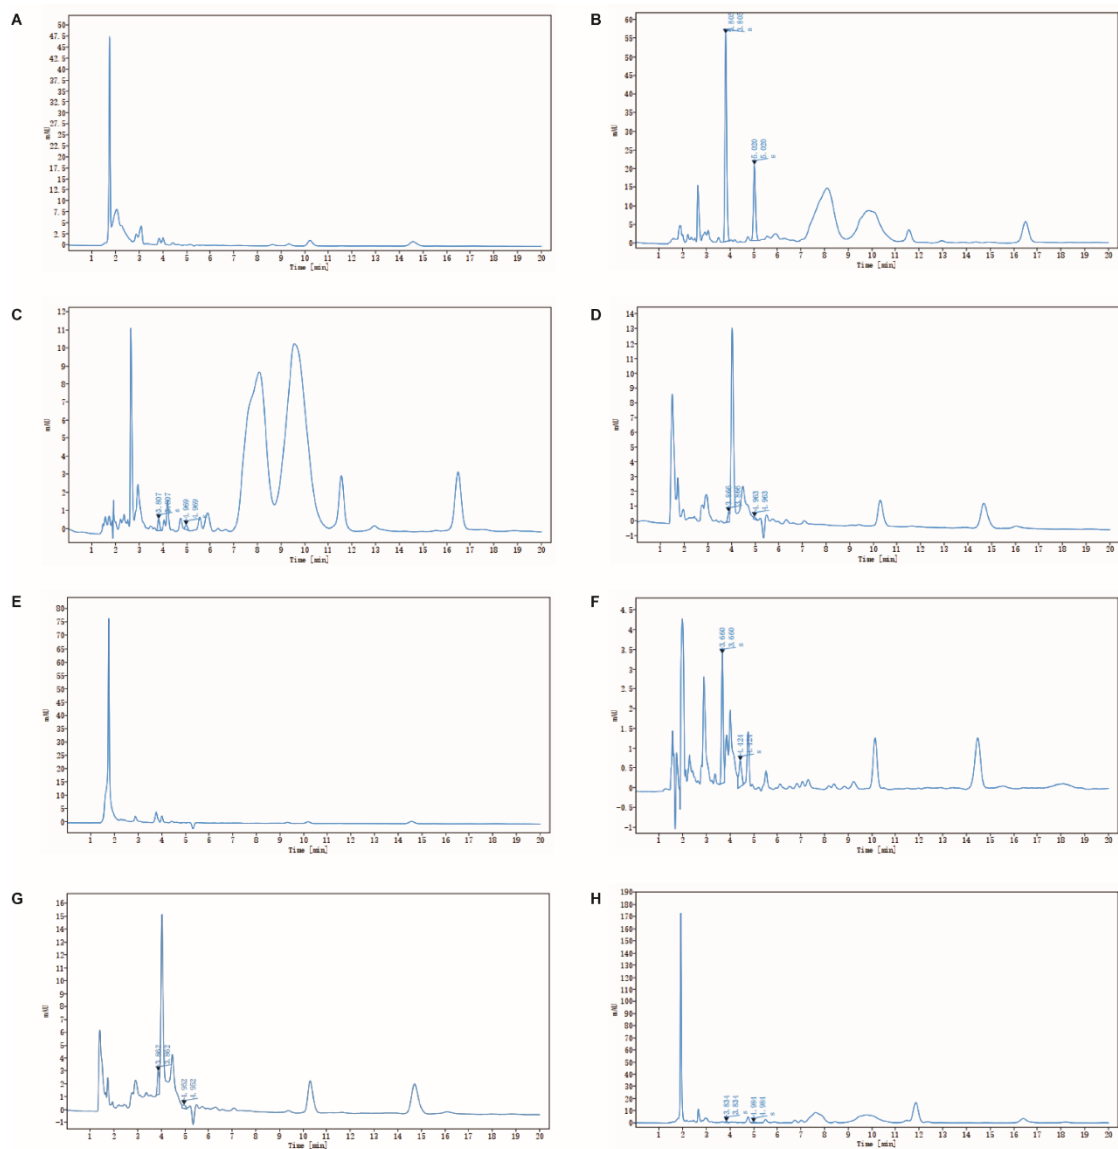

**Figure S3 Representative HPLC chromatograms of DHA in lung tissue samples following**

**intratracheal administration.**

(A) Blank lung tissue homogenate showing no endogenous interference at the DHA retention time. (B) HPLC chromatogram of blank lung homogenate spiked with DHA standard, confirming the characteristic DHA peak with a retention time ranging from 3.5 to 5.2 min. (C–E) Lung tissue samples collected at 12 h (C), 24 h (D), and 48 h (E) after intratracheal administration of free DHA. (F–H) Lung tissue samples collected at 12 h (F), 24 h (G), and 48 h (H) after intratracheal administration of DHA@HSA.

Representative chromatograms from  $n = 3$  biological replicates per time point are shown.

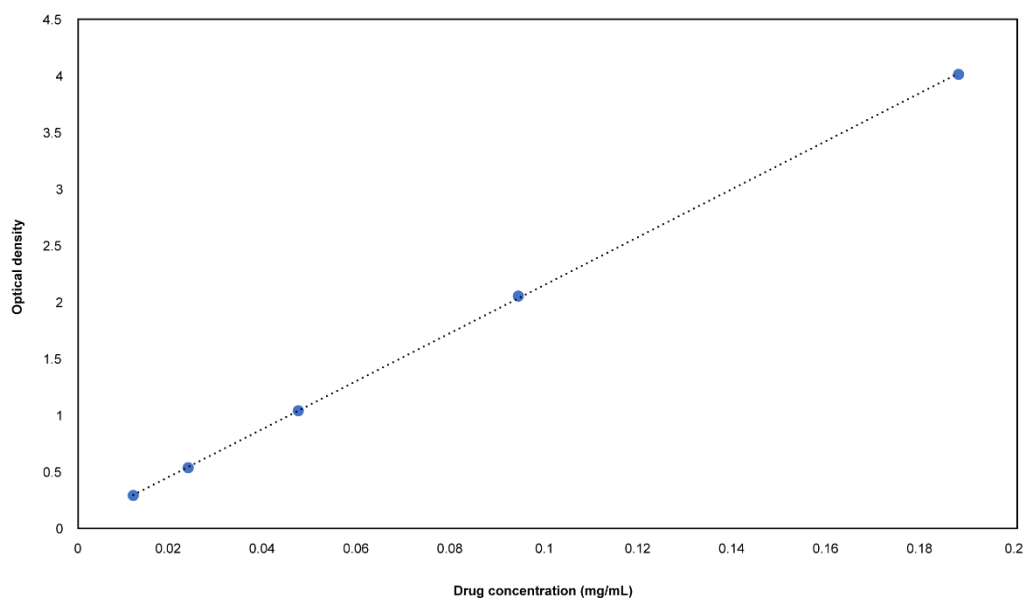

**Figure S4 Standard calibration curve for NIN determined by ultraviolet–visible spectrophotometry.**

Ultraviolet–visible (UV–Vis) spectrophotometry was employed to measure the absorbance of NIN standard solutions at the characteristic wavelength of 385 nm. A calibration curve was constructed by plotting absorbance against the nominal NIN concentrations. Linear regression analysis yielded the equation  $y = 21.211x + 0.0464$  with a coefficient of determination of  $R^2 = 0.9999$ , where  $y$  represents absorbance (optical density) and  $x$  represents the NIN concentration (mg/mL). This calibration curve was used for subsequent quantification of NIN in lung tissue samples.

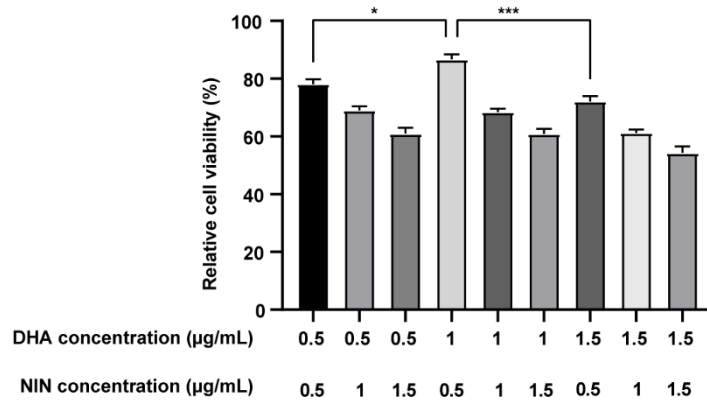

**Figure S5 Determination of the optimal concentration combination of DHA@HSA and NIN@HSA nanoparticles for NIH/3T3 cells.**

NIH/3T3 cells were treated with different concentration combinations of DHA@HSA and NIN@HSA nanoparticles for 48 h. Relative cell viability was assessed using the CCK-8 assay (n = 3). \* $p < 0.05$  and \*\*\* $p < 0.001$  (one-way ANOVA). Data are presented as mean  $\pm$  standard deviation (SD).

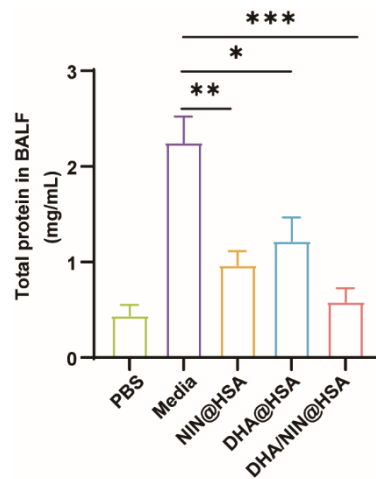

**Figure S6 DHA/NIN@HSA significantly reduced total protein levels in bronchoalveolar lavage**

**fluid.** Total protein concentration in bronchoalveolar lavage fluid (BALF) from different treatment groups (n = 6). \* $p < 0.05$ , \*\* $p < 0.01$ , and \*\*\* $p < 0.001$  (one-way ANOVA). Data are presented as mean  $\pm$  standard deviation (SD).

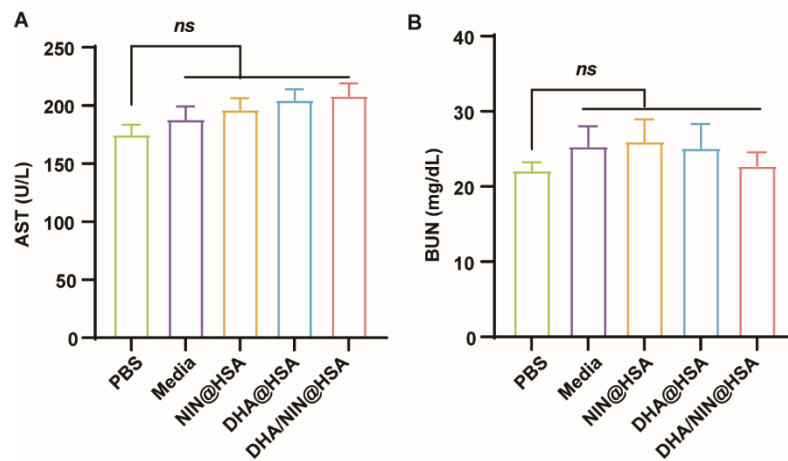

**Figure S7 Serum biochemical evaluation of systemic biosafety after different treatments. (A-B)**

Serum aspartate aminotransferase (AST) and blood urea nitrogen (BUN) levels in mice from different groups (n = 6). ns, not significant;  $p \geq 0.05$  (one-way ANOVA). Data are presented as mean  $\pm$  standard deviation (SD).

**Table S1 Pulmonary retention data (%) of DHA and NIN formulations at different time points after intratracheal administration.**

| Formulation | Time (h) | Replicate 1 (%) | Replicate 2 (%) | Replicate 3 (%) | Mean $\pm$ SD (%) |
|-------------|----------|-----------------|-----------------|-----------------|-------------------|
| DHA         | 12       | 13              | 23              | 16              | 17.33 $\pm$ 5.13  |
|             | 24       | 11              | 7               | 9               | 9 $\pm$ 2         |
|             | 48       | 0               | 0               | 0               | 0 $\pm$ 0         |
| DHA@HSA     | 12       | 72              | 83              | 69              | 74.67 $\pm$ 7.37  |
|             | 24       | 54              | 59              | 44              | 52.33 $\pm$ 7.64  |
|             | 48       | 12              | 19              | 27              | 19.33 $\pm$ 7.51  |
| NIN         | 12       | 30              | 24              | 16              | 23.33 $\pm$ 7.02  |
|             | 24       | 13              | 19              | 10              | 14 $\pm$ 4.58     |
|             | 48       | 0               | 0               | 0               | 0 $\pm$ 0         |
| NIN@HSA     | 12       | 76              | 85              | 70              | 77 $\pm$ 7.55     |
|             | 24       | 56              | 68              | 50              | 58 $\pm$ 9.17     |
|             | 48       | 35              | 26              | 20              | 27 $\pm$ 7.55     |

Footnotes: Pulmonary retention is expressed as percentage of the administered dose (%ID) and was calculated as

Drug retention (%ID) =  $(A_{\text{lung}} / D_{\text{admin}}) \times 100\%$ , where  $A_{\text{lung}} = C_{\text{ext}} \times V_{\text{ext}}$ . DHA concentrations were determined by HPLC, and NIN concentrations were determined by UV-Vis spectrophotometry.  $D_{\text{admin}}$  was 40  $\mu\text{g}$  for DHA (2 mg/kg, mean body weight 20 g) and 80  $\mu\text{g}$  for NIN per mouse per administration. Data represent individual values from n = 3 biological replicates per time point and are presented as mean  $\pm$  standard deviation (SD).
